# Supplementary material
Source: MDPI journal article supplement (https://www.mdpi.com/2075-163X/14/3/249)
Supplement: s1 [file s1]

**Table S4**

Major element-based least-squares modeling for Nb-Ta-rich and Nb-Ta-poor Iberian RMGs

| Modeling 1                                                | Fractionating assemblage (%) |                  |                  |                 |                 |               |                 | SSE   |
|-----------------------------------------------------------|------------------------------|------------------|------------------|-----------------|-----------------|---------------|-----------------|-------|
|                                                           | Qtz                          | Mus              | Kfs              | Pl              | Ap              | Grt           | Bt              |       |
| <i>Golpejas RMG</i><br><i>(Nb-Ta-rich)</i>                |                              |                  |                  |                 |                 |               |                 |       |
| Poorly evolved->Highly evolved<br>(Sample FAD007→FAD026C) | -                            | -1.74<br>(8.93)  | -9.57<br>(49.15) | -7.34<br>(37.7) | -0.82<br>(4.19) | -             | -               | 0.23  |
| <i>Penouta RMG</i><br><i>(Nb-Ta-rich)</i>                 |                              |                  |                  |                 |                 |               |                 |       |
| Bottom->Apical zone<br>(Sample P06053→P02660)             | -21.6<br>(60)                | -7.7<br>(21.4)   | -4.8<br>(13.5)   | -               | -               | -1.8<br>(5.1) | -               | 0.001 |
| <i>Pedroso de Acim RMG</i><br><i>(Nb-Ta-poor)</i>         |                              |                  |                  |                 |                 |               |                 |       |
| Sample PA-1→PA-3                                          | -2.85<br>(29.80)             | -1.67<br>(17.45) | -3.69<br>(38.62) | -               | -0.14<br>(1.42) | -             | -1.22<br>(12.7) | 0.002 |

SSE: Sum of squared residuals; F: percentage of residual liquid; minerals abbreviations after [161]; numbers in brackets are cumulate minerals normalized to 100; modeling carried out with the OPTIMASBA code [93]. Modeling for Penouta granite from [2].
